# Supplementary material
Source: PubMed Central journal article supplement (PMC1863486)

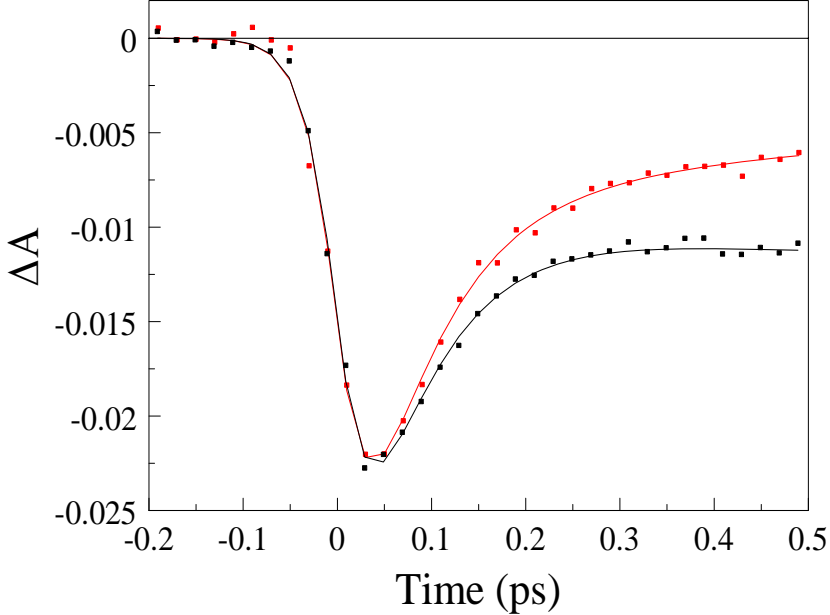

Supplement: pnas_0700445104_1.pdf [file pnas_0700445104_1.pdf]
